# Supplementary material
Source: publisher figshare collection journal article supplement (https://acs.figshare.com/ndownloader/files/30691157)
Supplement: Supplementary file 1 [file 30691157]

# Support Information

## Double Transition Metal Carbides MXenes (D-MXenes) as Promising Electrocatalysts for Hydrogen Reduction Reaction: *Ab initio* Calculations

Neng Li<sup>a, b,\*</sup>, Zhoulun Zeng<sup>a</sup>, Youwei Zhang<sup>a</sup>, Xingzhu Chen<sup>a</sup>, Zhouzhou Kong<sup>a</sup>, Arramel<sup>c</sup>,

Yong Li<sup>d</sup>, Peng Zhang<sup>e</sup>, Ba-Son Nguyen<sup>f</sup>

<sup>a</sup>State Key Laboratory of Silicate Materials for Architectures, Wuhan University of Technology, Wuhan 430070, Hubei, China

<sup>b</sup>Shenzhen Research Institute of Wuhan University of Technology, Shenzhen 518000, China

<sup>c</sup>Department of Physics, National University of Singapore, 2 Science Drive 3, Singapore, 117551 Singapore

<sup>d</sup>Institute of Oxygen Supply, Tibet University, Lhasa 850000, China

<sup>e</sup>State Center for International Cooperation on Designer Low-Carbon & Environmental Materials (CDLCEM), School of Materials Science and Engineering, Zhengzhou University, Zhengzhou, 450001, Henan, China

<sup>f</sup>Key Laboratory of Advanced Materials for Energy and Environmental Applications, Lac Hong University, Bien Hoa 810000, Vietnam

The surface Pourbaix diagram of the  $\text{Mo}_2\text{NbC}_2$  is constructed by plotting the thermodynamically most stable surface state under relevant  $U_{\text{SHE}}$  and pH, as shown in [Figure S1](#). We have been investigated the Pourbaix diagram of four different MXenes with adsorbates: partially terminated 1/8 ML  $\text{OH}^*$ , fully terminated 1 ML  $\text{OH}^*$ , a mixed termination consisting of 1/2 ML  $\text{OH}^*$  and 1/2 ML  $\text{O}^*$ , and fully terminated 1 ML  $\text{O}^*$ . The  $U_{\text{SHE}}$  is the applied voltage on the electrode referenced to the standard hydrogen electrode, and theoretically is defined in solution [pH = 0,  $p(\text{H}_2) = 1$  bar]. Bare  $\text{Mo}_2\text{NbC}_2$  is found to be stable at potentials lower than -1.13 V in an acidic solution (pH = 0).

With increasing  $U_{\text{SHE}}$ , more  $\text{OH}^*$  are adsorbed on the  $\text{Mo}_2\text{NbC}_2$  surface.  $U_{\text{SHE}}$  of the  $\text{Mo}_2\text{NbC}_2$  surface with full  $\text{OH}^*$  (1 ML) termination [ $\text{Mo}_2\text{NbC}_2(\text{OH})_2$ ] reaches to

−0.92 V. When the  $U_{\text{SHE}}$  continually increases, water oxidation begins, leading to increasing coverage of hydroxyl and oxygen on the MXenes surface. All terminated  $\text{OH}^*$  will be oxidized if the  $U_{\text{SHE}}$  continually increases, and then the stable  $\text{O}^*$  terminated  $\text{Mo}_2\text{NbC}_2$  MXenes ( $\text{Mo}_2\text{NbC}_2\text{O}_2$ ) are formed. At the acidic condition ( $\text{pH} = 0$ ), the lowest potential values for the fully  $\text{O}^*$  terminated  $\text{Mo}_2\text{NbC}_2$  (1 ML  $\text{O}^*$ ) are −0.435 V.

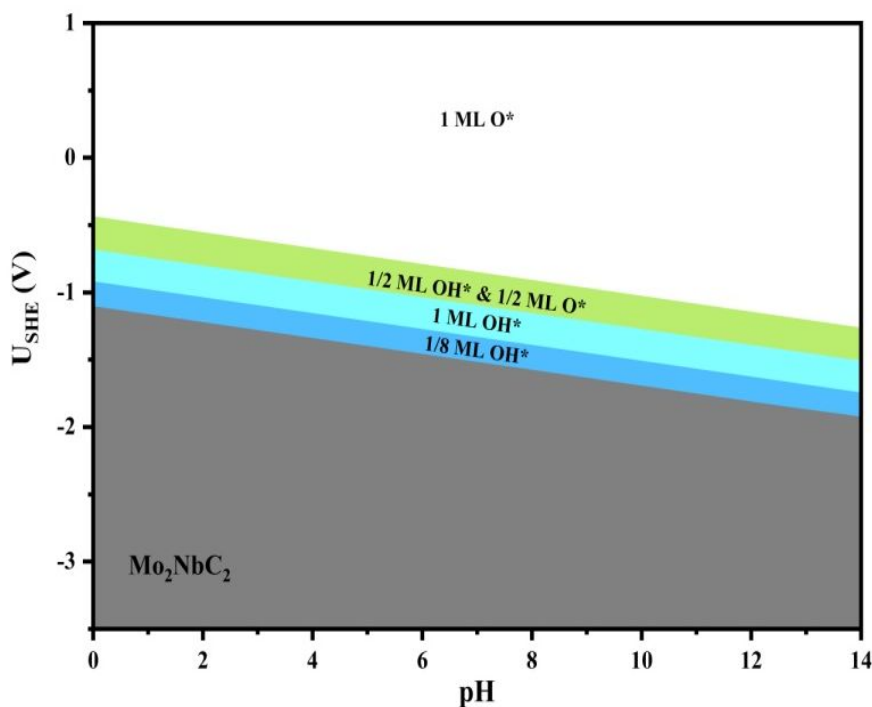

**Figure S1.** Calculated surface Pourbaix diagrams of  $\text{Mo}_2\text{NbC}_2$  showing the most stable terminations on the surface at specific potentials and pH values.

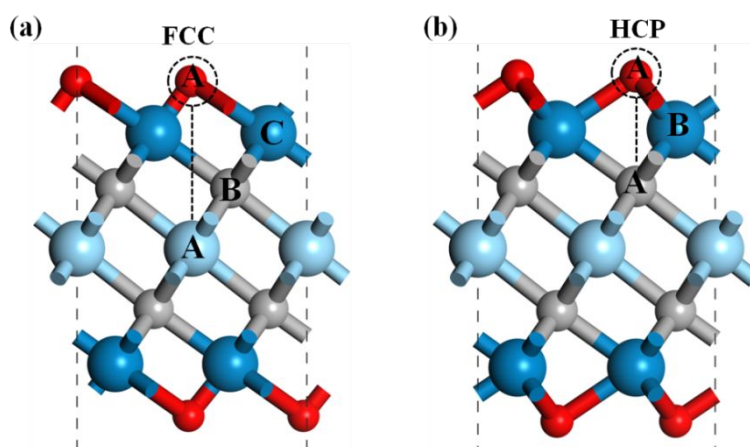

**Figure S2.** Side view of (a) FCC and (b) HCP sites for O-terminal double MXenes ( $\text{M}'_2\text{M}''\text{C}_2\text{O}_2$ ).
